# Supplementary material
Source: publisher figshare collection journal article supplement (https://brill.figshare.com/ndownloader/files/32399822)
Supplement: Supplementary file 1 [file 32399822]

# **A new subgenus of *Epeorus* and its five species from China (Ephemeroptera: Heptageniidae)**

**Ma Zhenxing and Zhou Changfa\***

The Key Laboratory of Jiangsu Biodiversity and Biotechnology, College of Life  
Sciences, Nanjing Normal University, Nanjing 210023, China

\*Corresponding author, e-mail: [zhouchangfa@njnu.edu.cn](mailto:zhouchangfa@njnu.edu.cn)

## **Supplementary material**

### **Sample sites of all other materials mentioned in this article:**

*Epeorus (Iron) aesculus* (Imanishi, 1934): 3 nymphs, Tributary of Erdao river, Changbai Mountain Nature Reserve, Jilin Province, collected by John C. MORSE, 29-VI-2011; 1 nymph, Laobai Mountain, Dunhua, Jilin Province, collected by Xuhongyi ZHEN, 28-VI-2019 (1 specimen for molecular study, specimens code: n45).

*Epeorus (Iron) maculatus* (Tshernova, 1949): 4 nymphs, Sandaobai River (43°13'56.63"N, 128°10'31.8"E), Antu County, Jilin Province, collected by John C. MORSE, Shuang QIU, 24-VIII-2019 (1 specimen for molecular study, specimens code: n46).

*Epeorus (Iron) alexandri* Kluge & Tiunova, 1989: 20 nymphs, Halaha River (1050 m a.s.l.), Aer mountain, Inner Mongolia, collected by Li SHI, Ming-Run TIAN, Yu-

Xuan ZHU, Xue-Feng GAO, 25-VII-2014 (1 specimen for molecular study, specimens code: t23).

*Epeorus (Iron) jacobi* (Braasch, 1978): 26 nymphs, Simuhana Village, Xinjiang, 15-IV-2008.

*Epeorus (Iron) montanus* (Brodsky, 1930): 8 nymphs, Yining County, Xinjiang, collected by Yi-Ke HAN, 19-V-2015; 7 nymphs, Tohulasu grassland, Yining County, Xinjiang, collected by Yi-Ke HAN, 2-VII-2015 (1 specimen for molecular study, specimens code: t9); 3 nymphs, Shuanglonggou, Shawan County, Shihezi City, Xinjiang, collected by Jian-Hua ZHANG, 27-VII-2013.

*Epeorus (Iron) rheophilus* (Brodsky, 1930): 5 nymphs, Tianshan, Xinjiang, collected by Liang LU, VIII-1992; 2 nymphs, Shuanglonggou, Shawan County, Shihezi City, Xinjiang, collected by Jian-Hua ZHANG, 27-VII-2013.

*Epeorus (Caucasiron) psi* (Eaton, 1885): 1 nymph, Nujiang (98°57'E, 25°50'16.8"N), Yunnan Province, collected by Xi-Yang HAO, 13-X-2019; 8 nymph, Motuo County, Linzhi City, Tibet, collected by Yi-Ke HAN, 13-VII-2014; 20 nymph, Xiaoyaodian Village, Wenshan City, Yunnan Province, collected by Zhen-Xing MA, 7-X-2020 (1 nymphal specimen for molecular study, specimens code: n51).

*Epeorus (Caucasiron) extraordinarius* Chen, Wang & Zhou, 2010: 1 ♂ 2 ♀ 5 nymphs, Wudong Village (26°22'55.4"N, 108°10'01.8"E), Leishan County, Guizhou Province, collected by Zhen-Xing MA, Xu-Hong-Yi ZHEN, 1–5-VIII-2019 (1 nymphal specimen for molecular study, specimens code: n15).

*Epeorus aculeatus* Braasch, 1990: 14 nymphs, Jumabao Village (27°3'37.3"N,

102°8'51.7"E), Pingbian County, Yunnan Province, collected by Zhen-Xing MA, 18-X-2020 (1 nymphal specimen for molecular study, specimens code: n52).

*Epeorus bispinosus* Braasch, 1980: 5 nymphs, Nujiang (27°12'10.8"N, 98°53'20.4"E), Yunnan Province, collected by Xi-Yang HAO, 15-X-2019 (2 specimens for molecular study, specimens code: n19, n20)
